# Supplementary material for: Recombinational branch migration by the RadA/Sms paralog of RecA in Escherichia coli
Source: eLife journal article supplement (doi:10.7554/elife.10807), 2016-02-04
Supplement: supp [file elife-10807-supp-v1.zip]

Archive with 10 entries (10 files):
- elife_poa_e10807_Figure_1_figure_supplement_3.pdf
- elife_poa_e10807_Figure_4_figure_supplement_4.pdf
- elife_poa_e10807_Figure_4_figure_supplement_3.pdf
- elife_poa_e10807_Figure_2_figure_supplement_2.pdf
- elife_poa_e10807_Figure_4_figure_supplement_2.pdf
- elife_poa_e10807_Figure_4_figure_supplement_1.pdf
- elife_poa_e10807_Figure_1_figure_supplement_1.pdf
- elife_poa_e10807_Figure_1_figure_supplement_2.pdf
- elife_poa_e10807_Figure_1_figure_supplement_4.pdf
- elife_poa_e10807_Figure_3_figure_supplement_1.pdf
