# Supplementary material for: Recombinational branch migration by the RadA/Sms paralog of RecA in Escherichia coli
Source: eLife journal article supplement (doi:10.7554/elife.10807), 2016-02-04
Supplement: supp [file elife-10807-supp-v1.zip]

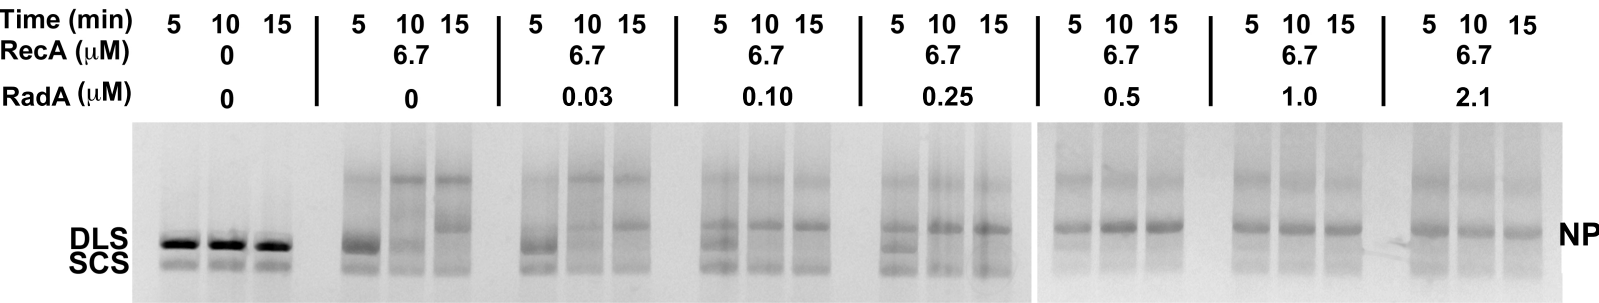

**Figure 4. Figure Supplement 3.** 3-strand recombination reactions with saturating RecA concentrations and RadA concentrations as indicated. Nicked product (NP),; Duplex Linear Substrate (DLS); Single-strand Circular Substrate (SCS).
