# Supplementary material for: Recombinational branch migration by the RadA/Sms paralog of RecA in Escherichia coli
Source: eLife journal article supplement (doi:10.7554/elife.10807), 2016-02-04
Supplement: supp [file elife-10807-supp-v1.zip]

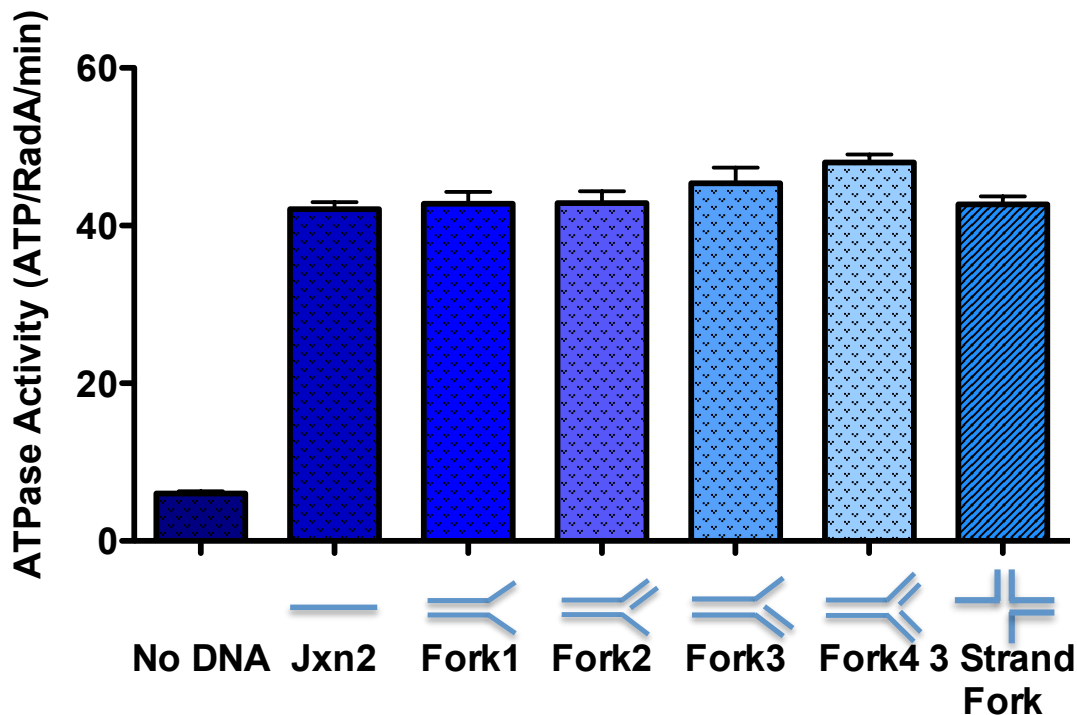

**Figure 2. Figure Supplement 1. RadA ATP Hydrolysis with Model Branched DNA Substrates as Cofactors.** NADH coupled ATP hydrolysis assays were performed as described in the procedures. Reactions contained 0.3  $\mu\text{M}$  (molecule) model forks and 0.63  $\mu\text{M}$  RadA. Average rates from three experiments are shown. Error bars represent standard deviations. The sequences for the oligonucleotides used to make the forks are in Table 2.
