# Supplementary material for: Recombinational branch migration by the RadA/Sms paralog of RecA in Escherichia coli
Source: eLife journal article supplement (doi:10.7554/elife.10807), 2016-02-04
Supplement: supp [file elife-10807-supp-v1.zip]

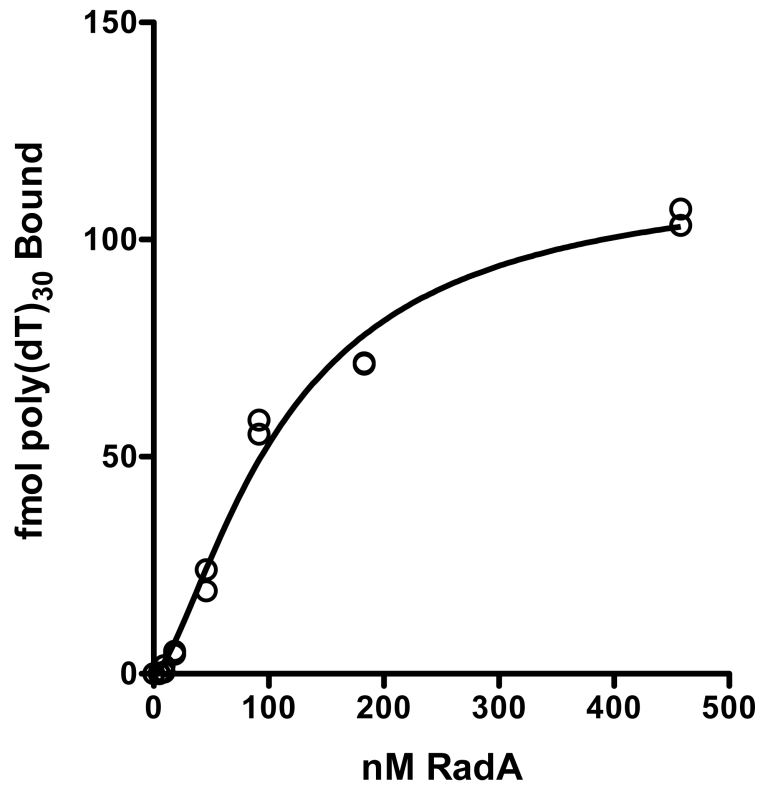

**Figure 1 Supplement 3. RadA Binding Curve to poly(dT)<sub>30</sub>.**

The autoradiographs from Figure1 Supplement 2 and a second gel were scanned and binding was quantitated using Image J 64. Prism Graph Pad was then used to fit the data to a binding curve. Data from two replicates are shown. The K<sub>d</sub> derived from this curve is 110 nM +/- 14 nM.
