# Supplementary material for: Recombinational branch migration by the RadA/Sms paralog of RecA in Escherichia coli
Source: eLife journal article supplement (doi:10.7554/elife.10807), 2016-02-04
Supplement: supp [file elife-10807-supp-v1.zip › elife_poa_e10807_Figure_1_figure_supplement_1.pdf]

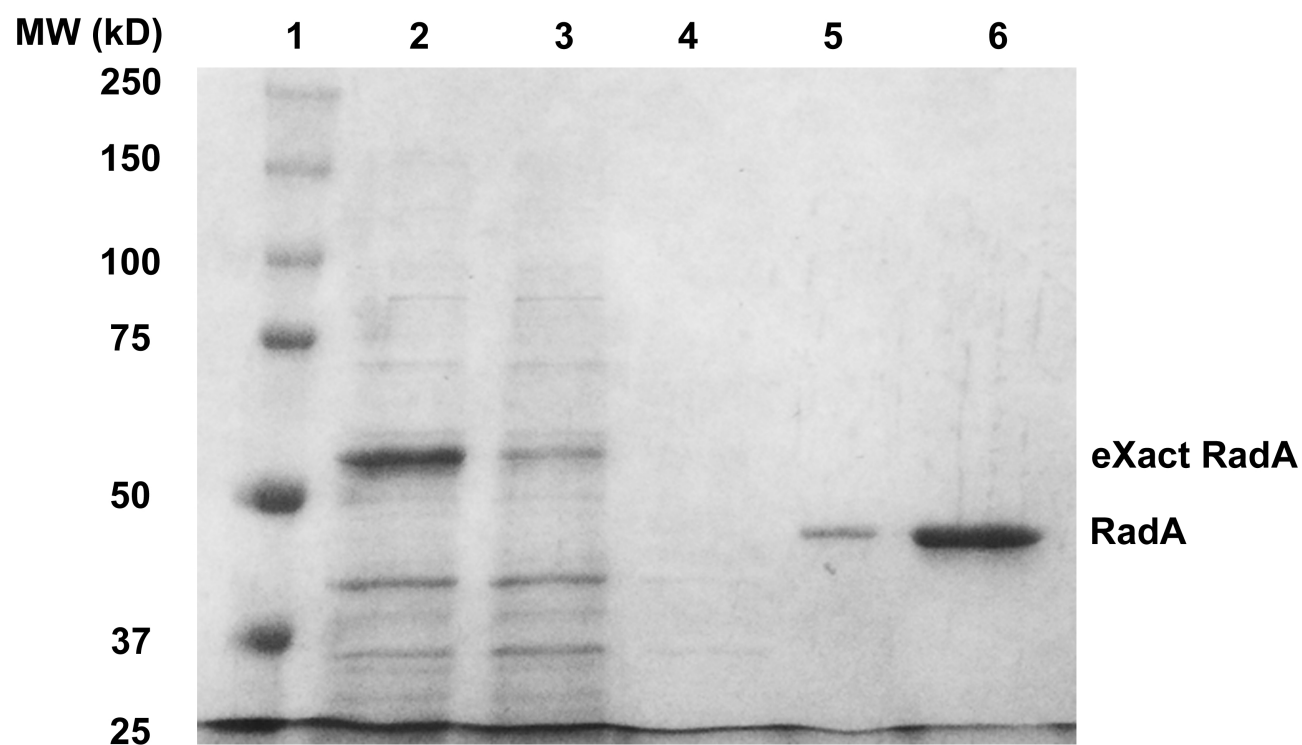

**Figure 1. Figure Supplement 1. SDS PAGE Gel Showing Purification of RadA.** Lane 1) MW Markers; Lane 2) Crude Lysate; Lane 3) Flowthrough; Lane 4) Wash; Lane 5) eXact peak fraction; Lane 6) MonoQ HP peak fraction.
