# Supplementary material for: Recombinational branch migration by the RadA/Sms paralog of RecA in Escherichia coli
Source: eLife journal article supplement (doi:10.7554/elife.10807), 2016-02-04
Supplement: supp [file elife-10807-supp-v1.zip › elife_poa_e10807_Figure_1_figure_supplement_4.pdf]

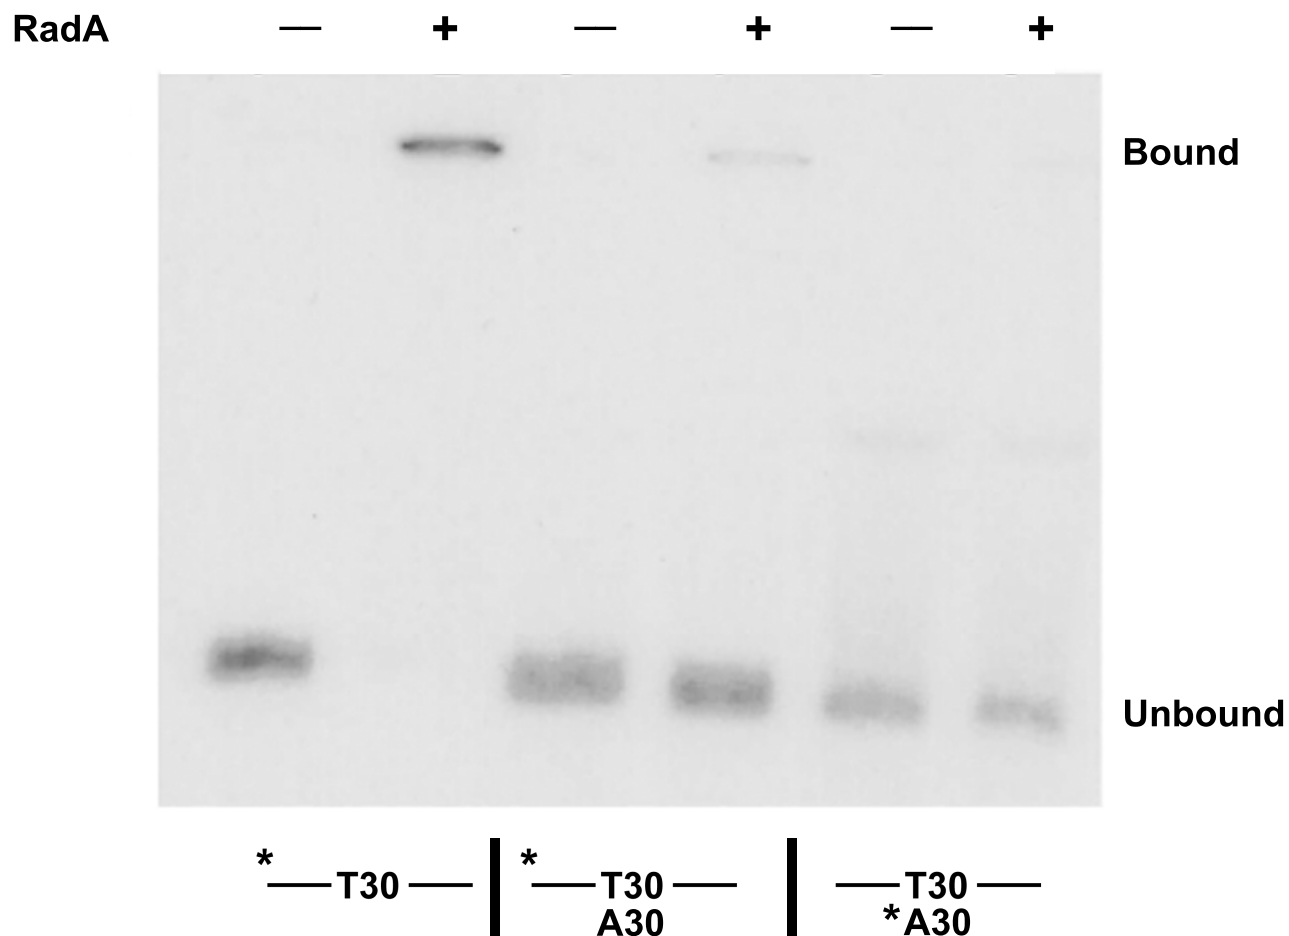

**Figure 1. Figure Supplement 4. Binding of RadA to Substrate E2.** Substrate E2 has approximately 30 nucleotides on either side of a poly(dT)<sub>30</sub> core. Polyd(A)<sub>30</sub> was annealed to E2 before the binding reaction was initiated. The \* indicates the strand labeled with <sup>32</sup>P.
