# Supplementary material for: Recombinational branch migration by the RadA/Sms paralog of RecA in Escherichia coli
Source: eLife journal article supplement (doi:10.7554/elife.10807), 2016-02-04
Supplement: supp [file elife-10807-supp-v1.zip › elife_poa_e10807_Figure_4_figure_supplement_1.pdf]

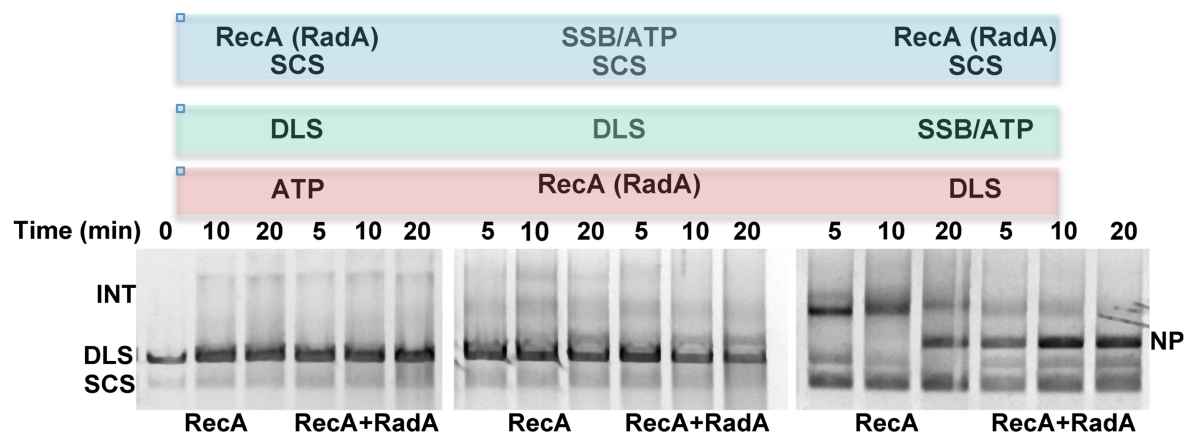

**Figure 4. Figure Supplement 1. Effect of order of addition of reaction components on 3-strand recombination reactions in the presence or absence of RadA.** Components in the blue box were pre-incubated with buffer and the regenerating system for 8 minutes at 37. Then, reaction components in the green box were added and pre-incubation was continued for 5 minutes. Recombination was initiated by addition of components in the red box. Reactions were then incubated for the times indicated above the gel.
