# Supplementary material for: Recombinational branch migration by the RadA/Sms paralog of RecA in Escherichia coli
Source: eLife journal article supplement (doi:10.7554/elife.10807), 2016-02-04
Supplement: supp [file elife-10807-supp-v1.zip › elife_poa_e10807_Figure_4_figure_supplement_2.pdf]

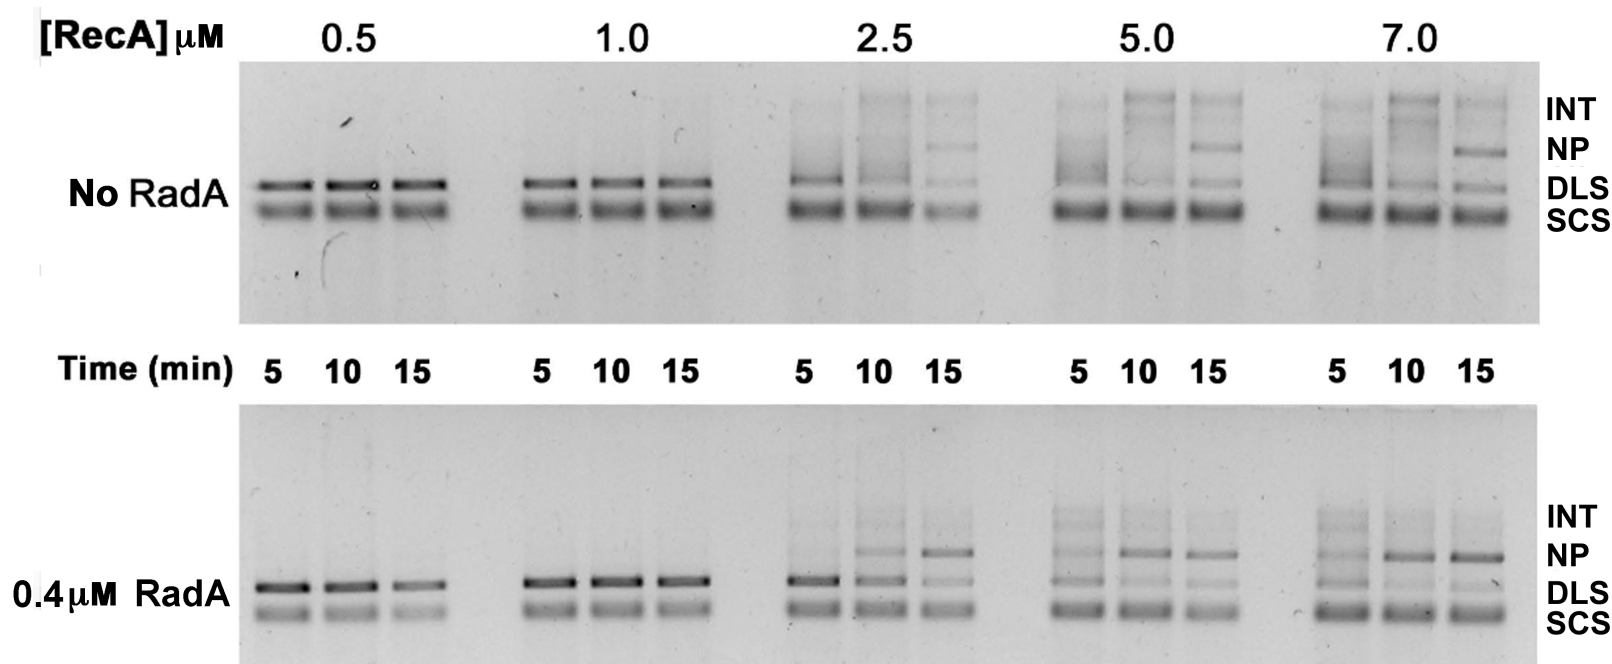

**Figure 4. Figure Supplement 2.** Titration of RecA in 3-strand recombination reactions in the presence or absence of RadA. Intermediates (INT); Nicked Product (NP); Duplex Linear Substrates (DLS); and Single-strand Circular Substrates (SCS).
