# Supplementary material for: Recombinational branch migration by the RadA/Sms paralog of RecA in Escherichia coli
Source: eLife journal article supplement (doi:10.7554/elife.10807), 2016-02-04
Supplement: supp [file elife-10807-supp-v1.zip › elife_poa_e10807_Figure_4_figure_supplement_4.pdf]

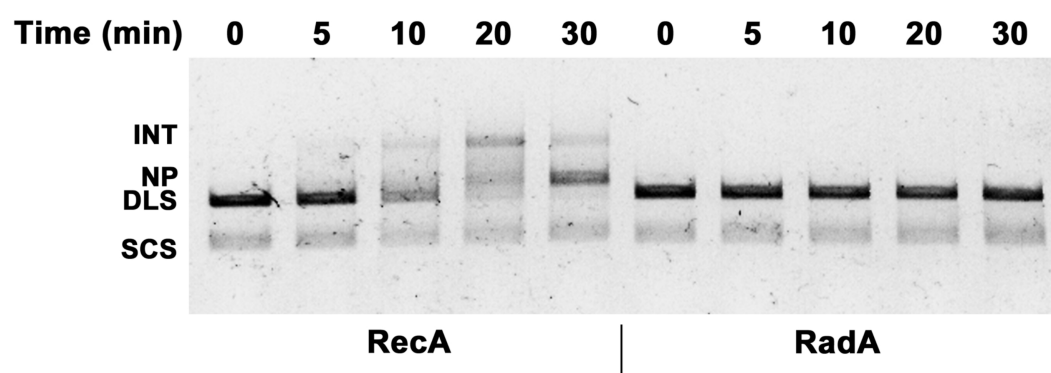

**Figure 4. Figure Supplement 4.** Effect of RadA alone on 3-strand recombination reactions. Reactions were performed as described in the procedures except 4  $\mu$ M RecA or Rad A was used.
