# Supplementary figures and images for: Recombinational branch migration by the RadA/Sms paralog of RecA in Escherichia coli
Source: eLife journal article supplement (doi:10.7554/elife.10807), 2016-02-04

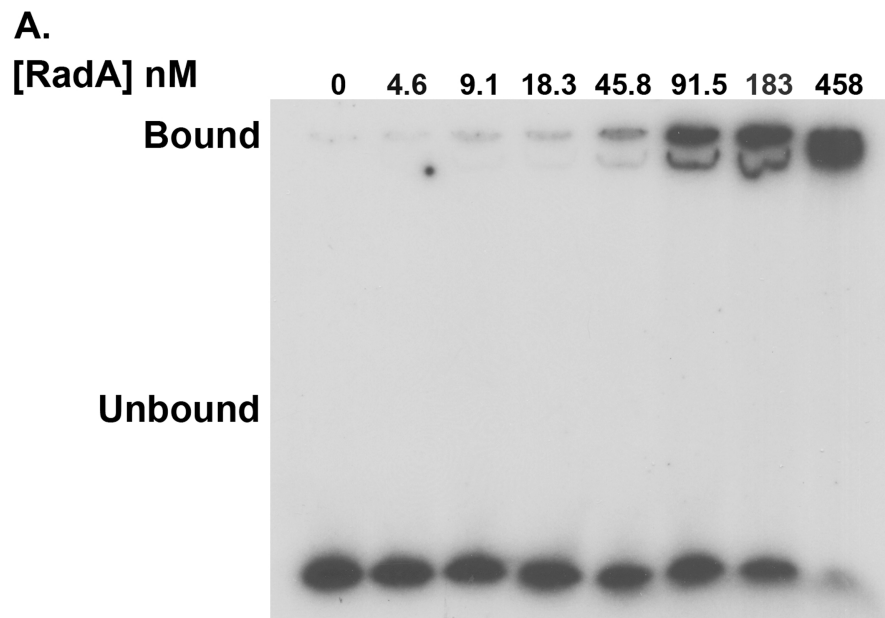

**Figure 1. Figure Supplement 2. RadA Binding to poly(dT)<sub>30</sub>.**

Supplement: supp [file elife-10807-supp-v1.zip]

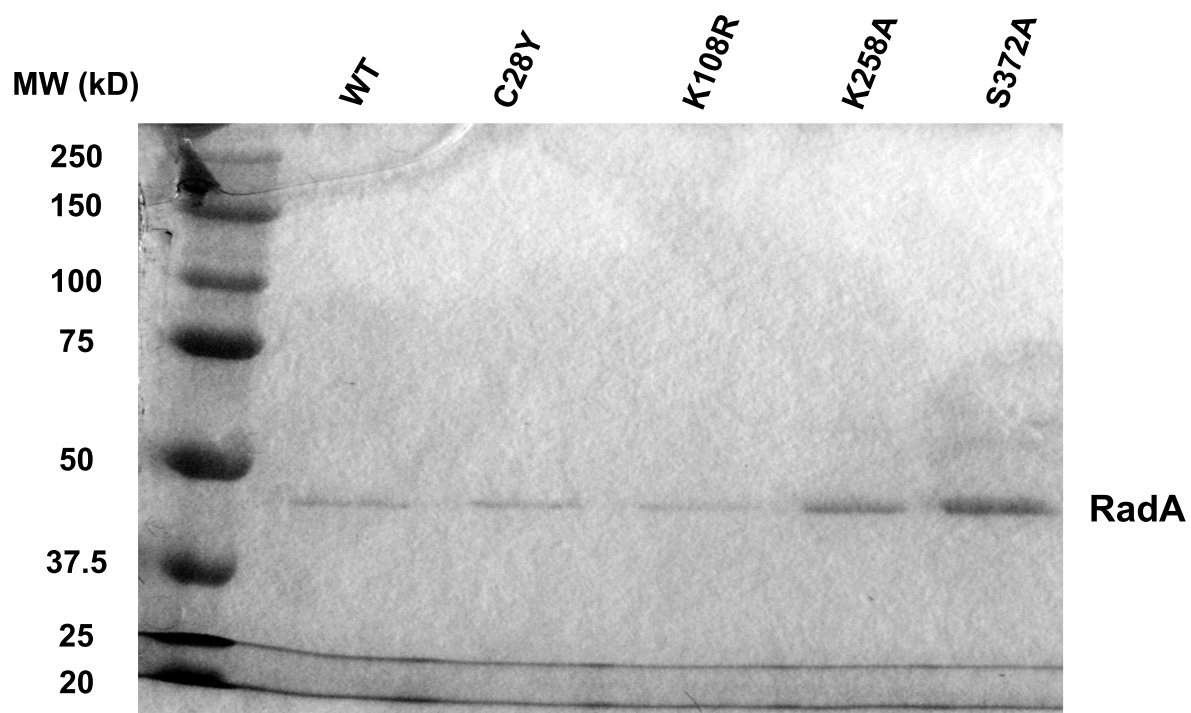

Figure 3. Figure Supplement 1. SDS-PAGE gel showing purified RadA mutants.

Supplement: supp [file elife-10807-supp-v1.zip › elife_poa_e10807_Figure_3_figure_supplement_1.pdf]
